# Supplementary material
Source: PubMed Central journal article supplement (PMC6983924)
Supplement: NIHMS1509849-supplement-1.pdf [file NIHMS1509849-supplement-1.pdf]

## Appendix A.

### Search Strategy

#### Pubmed

- #1 adolescent[Title/Abstract] OR adolescents[Title/Abstract] OR adolescence[Title/Abstract] OR youth[Title/Abstract] OR youth-based[Title/Abstract] OR teen[Title/Abstract] OR teens[Title/Abstract] OR teenager[Title/Abstract] OR teenagers[Title/Abstract] OR pediatric[Title/Abstract] OR college[Title/Abstract] OR student[Title/Abstract] OR students[Title/Abstract] OR "young adults"[Title/Abstract] OR "young adult"[Title/Abstract]
  - #2 diet[Title/Abstract] OR diets[Title/Abstract] OR dietary[Title/Abstract] OR nutrition[Title/Abstract] OR nutritional[Title/Abstract] OR food[Title/Abstract] OR foods[Title/Abstract] OR drinks[Title/Abstract] OR eat[Title/Abstract] OR eats[Title/Abstract] OR eating[Title/Abstract] OR beverage[Title/Abstract] OR beverages[Title/Abstract] OR meal[Title/Abstract] OR meals[Title/Abstract] OR recipe[Title/Abstract] OR recipes[Title/Abstract] OR "weight loss"[Title/Abstract] OR cooking[Title/Abstract]
  - #3 app[Title/Abstract] OR apps[Title/Abstract] OR "cellular phone"[Title/Abstract] OR "cellular phones" OR computer-tailored[Title/Abstract] OR email[Title/Abstract] OR "health information technology"[Title/Abstract] OR informatics[Title/Abstract] OR internet[Title/Abstract] OR internet-based[Title/Abstract] OR online[Title/Abstract] OR mhealth[Title/Abstract] OR mobile[Title/Abstract] OR "smart phone"[Title/Abstract] OR smartphone\*[Title/Abstract] OR SMS[Title/Abstract] OR technology[Title/Abstract] OR technology-based[Title/Abstract] OR telemedicine[Title/Abstract] OR "text message"[Title/Abstract] OR "text messages"[Title/Abstract] OR web-based[Title/Abstract] OR "short message service"[Title/Abstract] OR "multimedia message service"[Title/Abstract] OR computer\*[Title/Abstract] OR web-delivered[Title/Abstract] OR technolog\*[Title/Abstract] OR electronic\*[Title/Abstract] OR netnography[Title/Abstract] OR "Text messaging"[Title/Abstract] OR "Web-based learning"[Title/Abstract] OR blogging[Title/Abstract] OR "social media"[Title/Abstract] OR "social network\*"[Title/Abstract] OR myspace[Title/Abstract] OR twitter\*[Title/Abstract] OR facebook\*[Title/Abstract] OR instagram[Title/Abstract] OR "online discussion"[Title/Abstract]
  - #4 1 and 2 and 3
  - #5 adolescent OR Young adult OR Students[MeSH Terms]
  - #6 Diet OR Food Habits OR Weight loss OR Weight Reduction Programs OR Food OR Beverages OR Menu planning[MeSH Terms]
  - #7 Internet OR "Cell Phones" OR "Electronic Mail" OR "Telemedicine" OR "Computers, Handheld" OR "Mobile Applications" OR Telemedicine OR "Text Messaging" OR "social media" OR informatics OR "Social networking"[MeSH Terms]
  - #8 5 and 6 and 7
  - #9 4 or 8
  - #10 9 and (social or peer)
  - #11 10 limited to "last 10 years"[PDat] AND English[lang]
-

## EMBASE

- #1 app:ab,ti OR apps:ab,ti OR 'cellular phone':ab,ti OR 'cellular phones':ab,ti OR 'computer tailored':ab,ti OR email:ab,ti OR 'health information technology':ab,ti OR informatics:ab,ti OR internet:ab,ti OR 'internet based':ab,ti OR online:ab,ti OR mhealth:ab,ti OR mobile:ab,ti OR 'smart phone':ab,ti OR smartphone\*:ab,ti OR sms:ab,ti OR technology:ab,ti OR 'technology based':ab,ti OR telemedicine:ab,ti OR 'text message':ab,ti OR 'text messages':ab,ti OR 'web based':ab,ti OR 'short message service':ab,ti OR 'multimedia message service':ab,ti OR computer\*:ab,ti OR 'web delivered':ab,ti OR technolog\*:ab,ti OR electronic\*:ab,ti OR netnography:ab,ti OR 'text messaging':ab,ti OR 'web-based learning':ab,ti OR blogging:ab,ti OR 'social media':ab,ti OR 'social network\*':ab,ti OR myspace:ab,ti OR twitter\*:ab,ti OR facebook\*:ab,ti OR instagram:ab,ti OR 'online discussion':ab,ti
- #2 diet:ab,ti OR diets:ab,ti OR dietary:ab,ti OR nutrition:ab,ti OR nutritional:ab,ti OR food:ab,ti OR foods:ab,ti OR drinks:ab,ti OR eat:ab,ti OR eats:ab,ti OR eating:ab,ti OR beverage:ab,ti OR beverages:ab,ti OR meal:ab,ti OR meals:ab,ti OR recipe:ab,ti OR recipes:ab,ti OR 'weight loss':ab,ti OR cooking:ab,ti
- #3 adolescent:ab,ti OR adolescents:ab,ti OR adolescence:ab,ti OR youth:ab,ti OR 'youth based':ab,ti OR teen:ab,ti OR teens:ab,ti OR teenager:ab,ti OR teenagers:ab,ti OR pediatric:ab,ti OR college:ab,ti OR student:ab,ti OR students:ab,ti OR 'young adults':ab,ti OR 'young adult':ab,ti
- #4 1 and 2 and 3
- #5 'adolescent'/exp OR 'adolescent' OR 'teenager' OR 'young adult'/exp OR 'adult, young' OR 'young adult'
- #6 'mobile app'/exp OR 'computer'/exp OR 'internet'/exp OR 'smartphone'/exp OR 'social media'/exp OR 'social networking'/exp OR 'text messaging'/exp OR 'discussion group'
- #7 'eating'/exp OR 'recipe'/exp OR 'diet'/exp OR 'nutrition'/exp
- #8 5 and 6 and 7
- #9 4 or 8
- #10 9 and (social or peer)
- #11 10 limited to limited to English, 2006-2016, articles, articles in press, and conference papers

---

## CINAHL

- #1 adolescent OR adolescents OR adolescence OR youth OR youth-based OR teen OR teens OR teenager OR teenagers OR pediatric OR college OR student OR students OR "young adults" OR "young adult"
- #2 diet OR diets OR dietary OR nutrition OR nutritional OR food OR foods OR drinks OR eat OR eats OR eating OR beverage OR beverages OR meal OR meals OR recipe OR recipes OR "weight loss" OR cooking

- #3 app OR apps OR "cellular phone" OR "cellular phones" OR computer-tailored OR email OR "health information technology" OR informatics OR internet OR internet-based OR online OR mhealth OR mobile OR "smart phone" OR smartphone\* OR SMS OR technology OR technology-based OR telemedicine OR "text message" OR "text messages" OR web-based OR "short message service" OR "multimedia message service" OR computer\* OR web-delivered OR technolog\* OR electronic\* OR netnography OR "Text messaging" OR "Web-based learning" OR blogging OR "social media" OR "social network\*" OR myspace OR twitter\* OR facebook\* OR instagram OR "online discussion"
- #4 1 and 2 and 3 in abstract and title
- #5 4 limited to English, academic journals, 2006-2016, exclude Medline
- 

#### PsycINFO

- #1 adolescent OR adolescents OR adolescence OR youth OR youth-based OR teen OR teens OR teenager OR teenagers OR pediatric OR college OR student OR students OR "young adults" OR "young adult"
- #2 diet OR diets OR dietary OR nutrition OR nutritional OR food OR foods OR drinks OR eat OR eats OR eating OR beverage OR beverages OR meal OR meals OR recipe OR recipes OR "weight loss" OR cooking
- #3 app OR apps OR "cellular phone" OR "cellular phones" OR computer-tailored OR email OR "health information technology" OR informatics OR internet OR internet-based OR online OR mhealth OR mobile OR "smart phone" OR smartphone\* OR SMS OR technology OR technology-based OR telemedicine OR "text message" OR "text messages" OR web-based OR "short message service" OR "multimedia message service" OR computer\* OR web-delivered OR technolog\* OR electronic\* OR netnography OR "Text messaging" OR "Web-based learning" OR blogging OR "social media" OR "social network\*" OR myspace OR twitter\* OR facebook\* OR instagram OR "online discussion"
- #4 1 and 2 and 3 in abstract and title
- 

#### ACM

- #1 adolescent OR adolescents OR adolescence OR youth OR youth-based OR teen OR teens OR teenager OR teenagers OR pediatric OR college OR student OR students OR "young adults" OR "young adult"
- #2 diet OR diets OR dietary OR nutrition OR nutritional OR food OR foods OR drinks OR eat OR eats OR eating OR beverage OR beverages OR meal OR meals OR recipe OR recipes OR "weight loss" OR cooking
- #3 1 and 2 in abstract
- #4 3 and (social or peer or peers)
